# Supplementary material for: Transgenesis and web resources in quail
Source: eLife journal article supplement (doi:10.7554/elife.56312), 2020-05-27
Supplement: supp [file elife-56312-supp-v1.zip]

Archive with 6 entries (6 files):
- elife_poa_e56312_Transparent_Reporting_File.pdf
- elife_poa_e56312_Video_1.avi
- elife_poa_e56312_Video_2.avi
- elife_poa_e56312_Video_3.mp4
- elife_poa_e56312_Video_4.mp4
- elife_poa_e56312_Video_5.mp4
